# Supplementary material for: Comparison of two closed-path cavity based spectrometers for measuring air-water CO 2 and CH 4 fluxes by eddy covariance
Source: Copernicus journal article supplement (doi:10.5194/amt-2016-215), 2016-08-24
Supplement: Supplementary file [file amt-2016-215-AC1-supplement.pdf]

Author Comment with regard to:

Comparison of two closed-path cavity based spectrometers for measuring  
air-water CO<sub>2</sub> and CH<sub>4</sub> fluxes by eddy covariance

by M. Yang et al.

26 October, 2016

Many thanks for the detailed and insightful *comments and suggestions from Referee S. Landwehr*. Below we present each comment (in *italic*), followed by our reply. All of our replies are incorporated into the revised manuscript where appropriate, unless indicated otherwise.

**General comments**

*In this submission the authors present direct Eddy Covariance measurements of CO<sub>2</sub> and CH<sub>4</sub> air-sea fluxes made with two commercially available cavity based spectrometers (a Picarro G2311-f and a Los Gatos Research (LGR) FGGA) on a coastal site. The two analysers are deployed side by side and the flux measurements are compared directly. The Picarro was most of the time deployed downstream of a Nafion dryer, while the LGR was sampling the air directly.*

*The authors address measurement issues like the under sampling of high frequency fluctuations by the closed path Eddy Covariance systems and the cross-sensitivity of the optical measurements of CO<sub>2</sub> and CH<sub>4</sub> to H<sub>2</sub>O.*

*Different methods are used to calculate flux detection limits for CO<sub>2</sub> and CH<sub>4</sub> and these are put in context with global climatologies, providing useful guidance for the planning of future measurements of these gas fluxes over the open ocean.*

*The authors find that the CH<sub>4</sub> and CO<sub>2</sub> fluxes measured by the two analysers agree within the given uncertainties, but that the LGR showed much higher noise in the two flux signals than the Picarro. A discussion of the potential reasons for the inferior performance of the LGR, like suboptimal cavity ringdown time, less rigorous maintenance of a stable measurement cell pressure and temperature, as well as a less sophisticated H<sub>2</sub>O cross sensitivity correction performed by the LGR is provided. In my opinion the addressing of the sample air density and H<sub>2</sub>O cross sensitivity related corrections made in the LGR would benefit from some minor revisions.*

We are happy to hear that the referee finds our contribution useful. Our answers below and changes in the manuscript address the referee's specific questions.

**Specific comments**

*Page 5, lines 8–10 “As a result, we expect biases in CO<sub>2</sub> and CH<sub>4</sub> fluxes computed from Equations 1 and 2 only when the fluctuations in H<sub>2</sub>O are large and are correlated with fluctuations in dry CO<sub>2</sub> and CH<sub>4</sub> mixing ratios (i.e. due to any residual cross-sensitivity with H<sub>2</sub>O).”:*

*I find this sentence rather confusing: In general the fluctuations of the concentrations of all three gases should be highly correlated as they are transported by the same eddies.*

*Biases in the CO<sub>2</sub> and CH<sub>4</sub> fluxes computed from Equations 1 and 2 would suggest that the cross-sensitivity model is insufficient or that the coefficients are inaccurate, e.g., when  $b = d = 0$  is assumed for the LGR FGGA.*

*The relative magnitudes of the corrections made in the Equations 1 and 2 scale with the magnitude of the H<sub>2</sub>O fluctuations (in the measurement volume) and with the ratio of the CO<sub>2</sub>/CH<sub>4</sub> background concentrations to the ambient fluxes, which is typically the case for CO<sub>2</sub>.*

We agree with the referee's comment and apologize for our confusing statement. We have now modified that sentence to "Significant biases in CO<sub>2</sub> and CH<sub>4</sub> fluxes computed from Equations 1 and 2 would imply that these mathematical corrections are inaccurate or insufficient at describing the cross-sensitivities between the trace gases and H<sub>2</sub>O. The greatest relative biases are expected to occur when the magnitude of the H<sub>2</sub>O fluctuations in the measurement cavity is large and when the trace gas fluxes are small."

*Page 6, lines 3–6: Based on the slow response to the flushing with pure nitrogen, I would speculated that the offset could be caused by H<sub>2</sub>O sticking to the mirrors of the LGR cavity (or rather to the salt and dust particles mentioned in lines 214–215). How did the Picarro react to the flushing with pure nitrogen?*

Thanks for the comment. The Picarro CO<sub>2</sub>, CH<sub>4</sub>, and H<sub>2</sub>O levels approached zero very rapidly when measuring pure nitrogen. The LGR does exhibit a positive offset relative to the Picarro in the H<sub>2</sub>O measurement as well (by ~100 ppm when measuring N<sub>2</sub>), but this difference is not nearly large enough to cause a bias in CO<sub>2</sub> measurement on the order of ~10 ppm. More recent measurements of NOAA CO<sub>2</sub> gas standards using the LGR show that the offset in the LGR is most likely due to an inaccurate instrument calibration.

*Page 7, lines 15–17 "Since the gas fluxes were computed using the same wind data and the two analyzers were sampling the same gas stream, differences between them are primarily caused by noise in the instruments, rather than by the presence of water vapor." :*

*Based on the evidence provided I cannot follow this conclusion. It might well be that the relatively small H<sub>2</sub>O cross sensitivity corrections, which are applied by the LGR, are insufficient. See also the next comment on Figure 5.*

We made this statement because the LGR fluxes (wet) and the Picarro fluxes (physically dried) are similar in the mean. The LGR fluxes (wet and numerically dried) show greater scatter, which is primarily due to noise in the LGR instrument rather than any corrections for water vapor. To be more specific, we have changed the second part of the sentence to "...hour to hour differences between them are primarily...."

*Page 7, lines 18–23 and Figure 5.: If the differences in the CH<sub>4</sub> and CO<sub>2</sub> measurements from the LGR (wet) and Picarro (dry) are caused by cross sensitivity of the LGR signals to H<sub>2</sub>O one would expect a correlation with the latent heat flux measured by the LGR, but not necessarily with the predicted latent heat flux (the authors stated large and variable losses in the H<sub>2</sub>O flux signal measured by the LGR). I would therefore suggest*

to use the Latent heat flux measured by the LGR, instead of the predicted flux, as independent variable in Figure 5. The difference in the CO<sub>2</sub> fluxes measured by the two instruments should also be plotted as function of the latent heat flux measured by the LGR.

Thanks a lot for the comment. The plots below show what the referee had suggested. The LGR H<sub>2</sub>O flux is computed at the optimal lag time for H<sub>2</sub>O (~20s). The same qualitative trend is seen as in Fig. 5, i.e. the differences in CO<sub>2</sub> and CH<sub>4</sub> fluxes due to the H<sub>2</sub>O correction increase with increasing H<sub>2</sub>O flux. Also, the equivalent of the current Fig. 5 for CO<sub>2</sub> illustrates a similar pattern to CH<sub>4</sub>, which is why we didn't show it in the current manuscript.

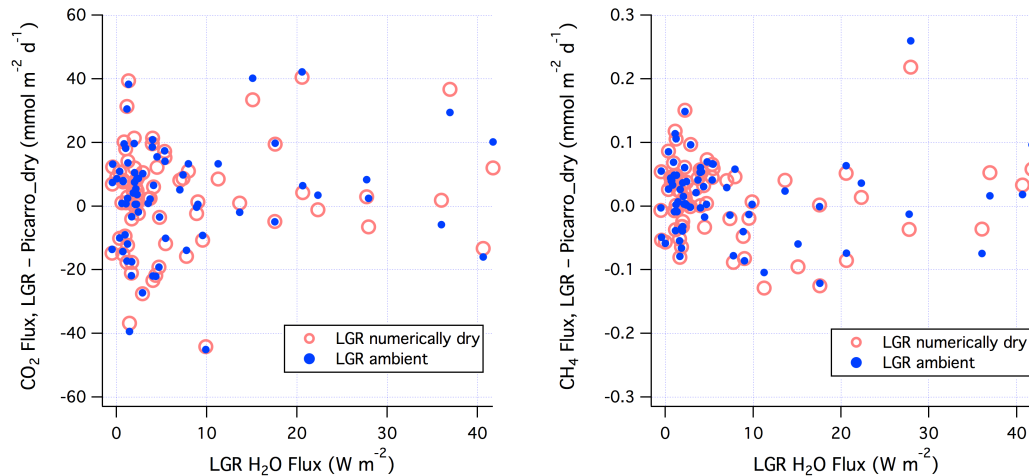

We did not include these plots in the paper because the measured LGR H<sub>2</sub>O flux was severely attenuated by the tubing and its actual magnitude in W/m<sup>2</sup> is probably not especially informative for other users/translatable to other setup. The following plot shows that measured LGR H<sub>2</sub>O flux increases non-linearly with bulk H<sub>2</sub>O flux. We will add these plots to supplementary materials.

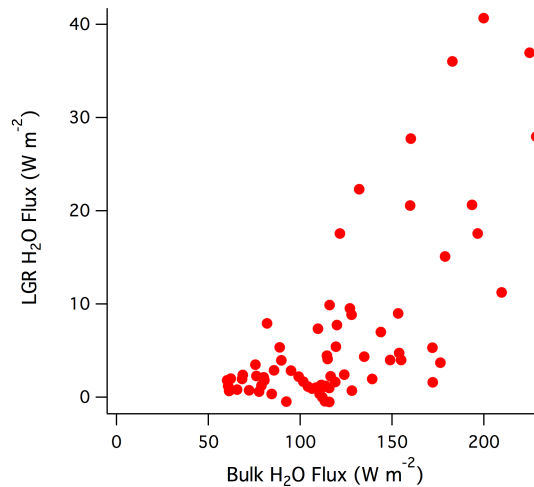

Page 7, lines 25–26: How were the coefficients for the here mentioned spectral line broadening correction for the LGR determined?

We used coefficients proposed by Hiller et al. 2012 here. This is now specified in the paper.

*By using the Picarro (dry) CH<sub>4</sub> and CO<sub>2</sub> measurements as reference signal, you could calculate spectral line broadening coefficients for this specific LGR instrument in real time. Are these estimated coefficients constant or do they change in time? The latter might indicate a similar cross sensitivity effect as for the non-dispersive infra red gas analysers (Prytherch et al. 2010, Blomquist et al. (2014), and Landwehr et al. (2014)).*

It'd likely be rather uncertain to use the Picarro (dry) data to determine the spectral broadening coefficients for the LGR due to the existing instrumental calibration offsets between the Picarro and LGR at measuring dry CO<sub>2</sub>/CH<sub>4</sub>.

To more accurately determine the spectral broadening coefficients, one could look at the LGR responses while humidifying a CO<sub>2</sub>/CH<sub>4</sub> gas standard to different humidity levels (monitored by a separate humidity sensor). Such a calibration would be more beneficial to high-precision CO<sub>2</sub>/CH<sub>4</sub> mixing ratio measurements than to this work, considering the likely very small effect of this correction on the CO<sub>2</sub>/CH<sub>4</sub> fluxes.

*Page 8, lines 3–4: Did you get a chance to verify this by opening the cavity? The presence of salt and dust particles in the cavity might also explain the slow response to the flushing with N<sub>2</sub>, mentioned in the lines 155–159.*

We did open the cavity. While dust and sea salt were not clearly visible to the naked eye, the simple act of opening the cavity and closing it again further reduced the ringdown time, suggesting that the mirrors became more contaminated by exposure to the hut air.

*Page 8, lines 12–16: Were the temperature and pressure in the cavities measured and used to account for dilution effects on CH<sub>4</sub> and CO<sub>2</sub> (Webb correction)?*

Temperature and pressure of the cavities were continuously monitored (at 10 Hz). The CO<sub>2</sub> and CH<sub>4</sub> fluxes were computed from the measured mixing ratios at these T, P (rather than from mass concentrations), so that an additional Webb correction for T, P shouldn't be necessary. The differences between LGR wet and numerically dried fluxes do include the dilution effect due to humidity.

*Page 11, lines 1–5: For the estimation of the high frequency loss in the gas fluxes, it might be more adequate to use the sensible/virtual heat flux cospectra measured by the (open-path) sonic anemometer, instead of the momentum flux cospectra.*

We agree that heat flux, being a scalar flux, is more commonly used for the quantification of the high frequency flux loss. During this period the sensible heat flux was fairly small and fluctuated in sign between day and night. As a result the mean sensible heat flux spectrum was very noisy, which is why we chose to compare to momentum cospectrum instead.

*Figure 3: Do the authors have any suggestions, what may cause the large scatter*

*apparent in the difference between the LGR fluxes from numerically dry and ambient mixing ratios of CO<sub>2</sub> and CH<sub>4</sub>, while the same difference appears to be a solemn function of the humidity flux for the Picarro?*

This is likely due to the greater noise in the LGR instrument.

*Page 12, lines 24–27 and Figure A2: I would suggest to add a trend line to the data shown in Figure A2. To me the difference in the drag coefficients looks more like 30% of the CORARE 3.5 drag coefficient.*

Suggestion accepted. Please see below. The apparent underestimation of the measurement is ~15% at low wind speeds and ~30% at the highest wind speed. This is probably due to flow distortion by the local topography (i.e. mostly speeding up of horizontal wind), which we have not accounted for.

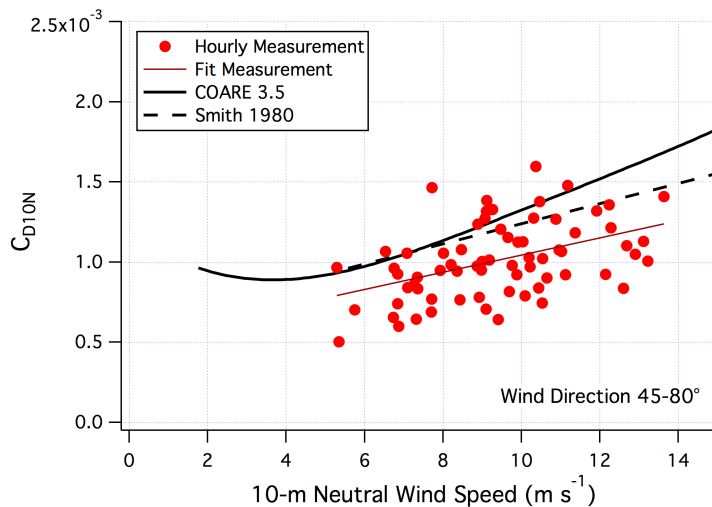

*From comparing the Picarro (wet) and Picarro (dry) measurements can you find any effect of the Nafion dryer on the CO<sub>2</sub> and CH<sub>4</sub> flux detection limits?*

The high frequency noise levels in CO<sub>2</sub> and CH<sub>4</sub> in the Picarro are comparable with and without the Nafion dryer. Thus we do not expect a significant difference in the Picarro detection limits due to the presence/absence of the dryer.

### **Technical corrections**

*Page 5, lines 11-12:: I would suggest to add the uncertainties of the slopes and intercepts.*

The uncertainties of the slopes (1 standard deviation) were about 0.001 (i.e. 0.1% since the slopes were close to unity). The uncertainties of the intercepts were about 0.5 ppm for CO<sub>2</sub> and 0.0018 ppm for CH<sub>4</sub> (i.e. also ~0.1% of the respective ambient mixing ratios).
